# Supplementary material
Source: ML conference proceedings conference paper supplement (https://proceedings.neurips.cc/paper_files/paper/2020/hash/48e59000d7dfcf6c1d96ce4a603ed738-Abstract.html)

NPU (real)  
Layer 1

Hidden

Input

$r =$

Output

NAU  
Layer 2

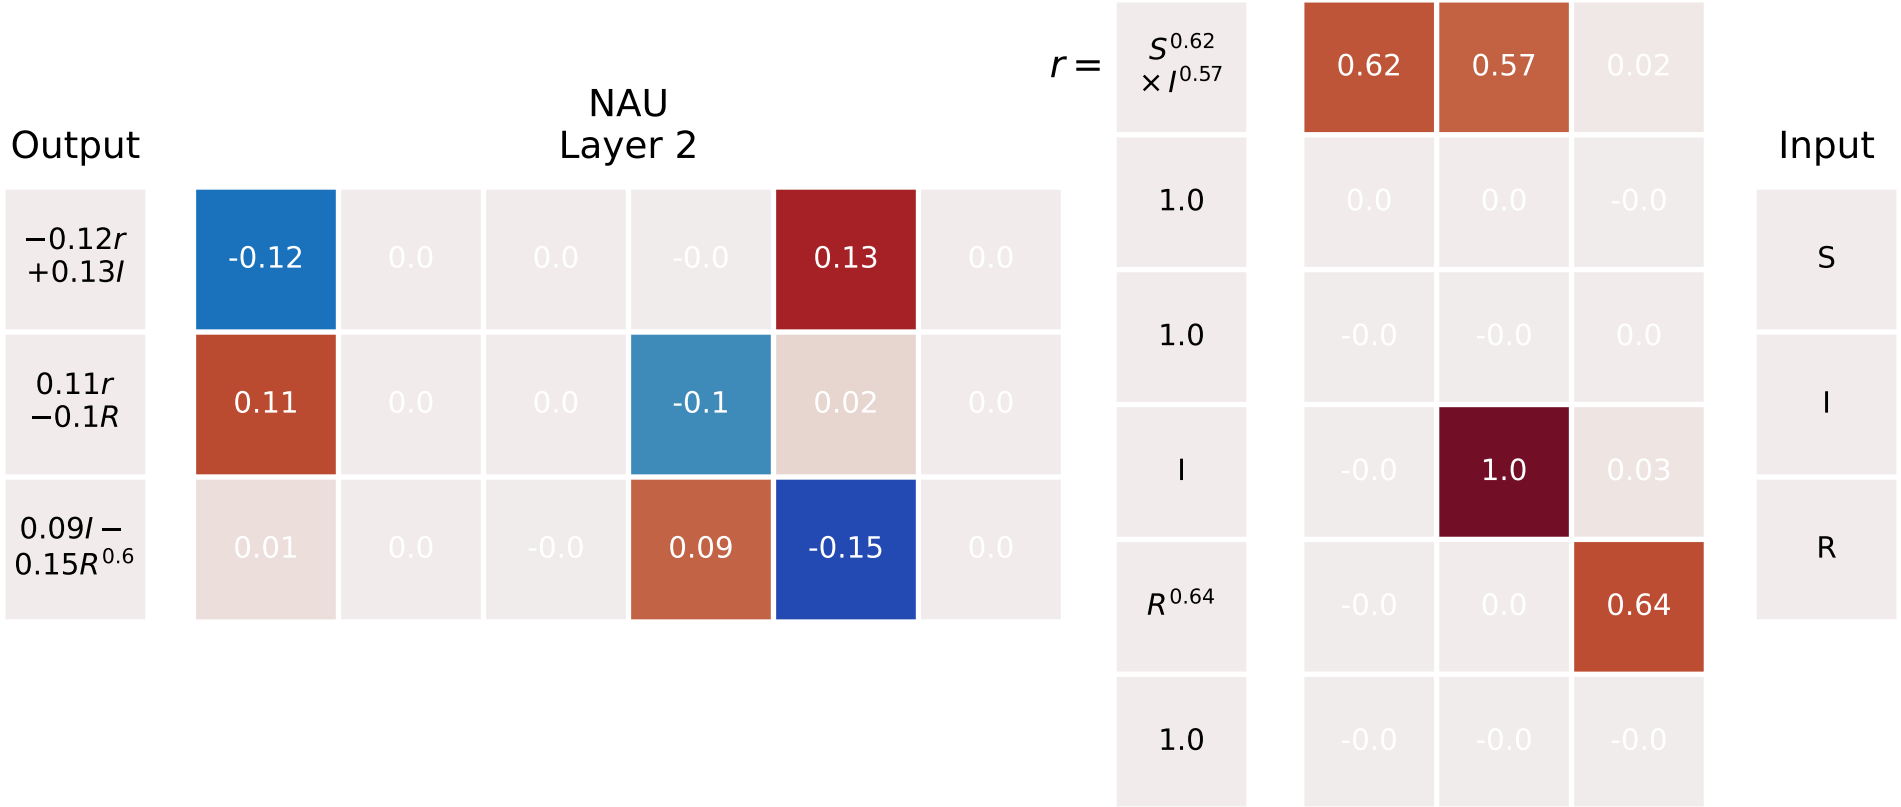

Supplement: Supplementary file [file 48e59000d7dfcf6c1d96ce4a603ed738-Supplemental.zip]
