# Supplementary material
Source: ML conference proceedings conference paper supplement (https://proceedings.neurips.cc/paper_files/paper/2020/hash/48e59000d7dfcf6c1d96ce4a603ed738-Abstract.html)

NaiveNPU

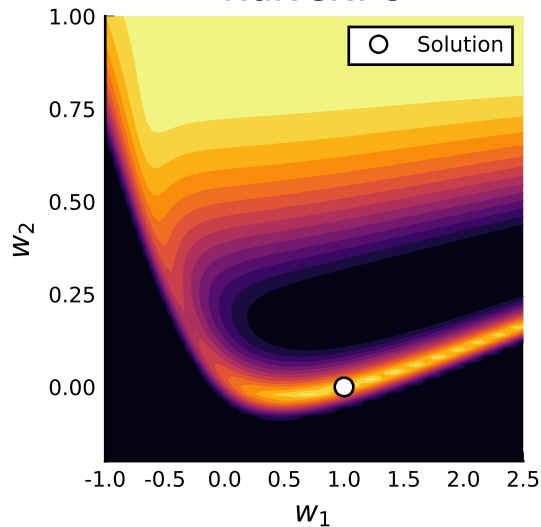NPU  $g_1 = g_2 = 0.5$ 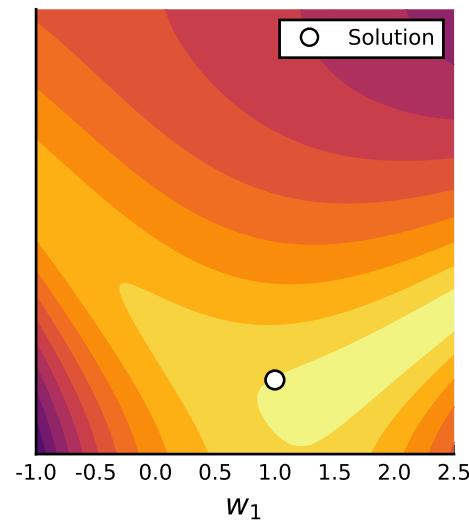NPU  $g_1 = 1; g_2 = 0$ 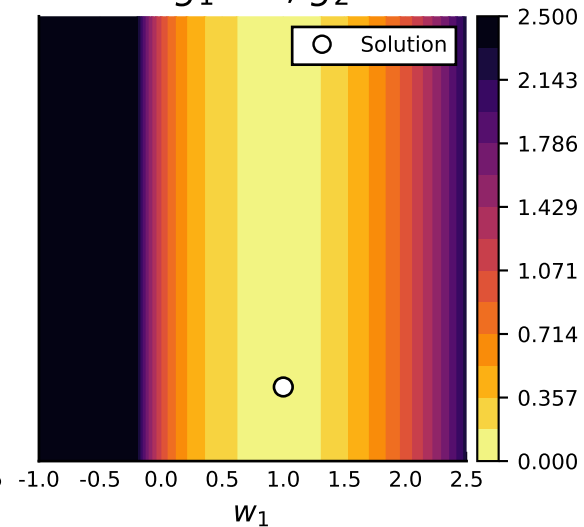

Supplement: Supplementary file [file 48e59000d7dfcf6c1d96ce4a603ed738-Supplemental.zip]
