# Supplementary material
Source: ML conference proceedings conference paper supplement (https://proceedings.neurips.cc/paper_files/paper/2020/hash/48e59000d7dfcf6c1d96ce4a603ed738-Abstract.html)
Supplement: Supplementary file [file 48e59000d7dfcf6c1d96ce4a603ed738-Supplemental.zip]

Table A1: Model definitions for the fSIR task.

| Model | Layer 1                          | Layer 2                      | Layer 3              |
|-------|----------------------------------|------------------------------|----------------------|
| NPU   | $\text{NPU}(3, h)$               | $\text{NAU}(h, 3)$           | –                    |
| NPU   | $\text{NPU}_{\text{real}}(3, h)$ | $\text{NAU}(h, 3)$           | –                    |
| Dense | $\text{Dense}(2, h, \sigma)$     | $\text{Dense}(h, h, \sigma)$ | $\text{Dense}(h, 3)$ |

Table A2: Testing error on the simple arithmetic task for the different models (i.e. mean of each heatmap in Fig. 6). Each value is obtained by computing median (and median absolute deviation) of the error of 20 models.

| Task           | NPU               | RealNPU                             | NMU                                 | NALU              | iNALU             | Dense             |
|----------------|-------------------|-------------------------------------|-------------------------------------|-------------------|-------------------|-------------------|
| +              | $0.2 \pm 0.11$    | <b><math>0.08 \pm 0.021</math></b>  | $0.2 \pm 0.18$                      | $2.69 \pm 0.22$   | $2.18 \pm 0.13$   | $2.103 \pm 0.04$  |
| $\times$       | $0.37 \pm 0.23$   | $0.066 \pm 0.026$                   | <b><math>0.005 \pm 0.004</math></b> | $4.55 \pm 0.2$    | $3.453 \pm 0.065$ | $3.546 \pm 0.035$ |
| $\div$         | $0.23 \pm 0.13$   | <b><math>0.085 \pm 0.038</math></b> | $11.399 \pm 0.035$                  | $3.33 \pm 0.18$   | $2.54 \pm 0.26$   | $14.16 \pm 0.23$  |
| $\sqrt{\cdot}$ | $0.031 \pm 0.025$ | <b><math>0.004 \pm 0.001</math></b> | $0.16 \pm 0.002$                    | $0.034 \pm 0.006$ | $0.049 \pm 0.011$ | $0.084 \pm 0.007$ |

Table A3: Model definitions for the simple arithmetic task.

| Model   | Layer 1                       | Layer 2                        | Layer 3               |
|---------|-------------------------------|--------------------------------|-----------------------|
| NPU     | $\text{NAU}(2, 6)$            | $\text{NPU}(6, 2)$             | –                     |
| RealNPU | $\text{NAU}(2, 6)$            | $\text{RealNPU}(6, 2)$         | –                     |
| NMU     | $\text{NAU}(2, 6)$            | $\text{NMU}(6, 2)$             | –                     |
| NALU    | $\text{NALU}(2, 6)$           | $\text{NALU}(6, 2)$            | –                     |
| iNALU   | $\text{iNALU}(2, 6)$          | $\text{iNALU}(6, 2)$           | –                     |
| Dense   | $\text{Dense}(2, 10, \sigma)$ | $\text{Dense}(10, 10, \sigma)$ | $\text{Dense}(10, 2)$ |

Table A4: Model definitions for the large scale arithmetic task.

| Model | Layer 1        | Layer 2      |
|-------|----------------|--------------|
| NPU   | NAU(100, 100)  | NPU(100, 1)  |
| NPU   | NAU(100, 100)  | NPU(100, 1)  |
| NMU   | NAU(100, 100)  | NMU(100, 1)  |
| NALU  | NALU(100, 100) | NALU(100, 1) |

Table A5: Dataset parameters for the large scale arithmetic task.

| Task | Input size | Subset ratio | Overlap ratio | Training range | Validation range |
|------|------------|--------------|---------------|----------------|------------------|
| Add  | 100        | 0.5          | 0.25          | Sobol(-1,1)    | Sobol(-4,4)      |
| Mult | 100        | 0.5          | 0.25          | Sobol(-1,1)    | Sobol(-4,4)      |
| Div  | 100        | 0.5          | –             | Sobol(0,0.5)   | Sobol(-0.5,0.5)  |
| Sqrt | 100        | 0.5          | –             | Sobol(0,2)     | Sobol(0,4)       |

Table A6: Training parameters for the large scale arithmetic task. The  $\beta$ -parameters define the stepwise exponential growth of the L1 regularization with start, step, growth, and end.

| Task | Learning rate | Iterations | $\beta_{\text{start}}$ | $\beta_{\text{end}}$ | $\beta_{\text{step}}$ | $\beta_{\text{growth}}$ |
|------|---------------|------------|------------------------|----------------------|-----------------------|-------------------------|
| Add  | 1e-2          | 1e5        | 1e-5                   | 1e-4                 | 10 000                | 10                      |
| Mult | 5e-3          | 1e5        | 1e-5                   | 1e-7                 | 10 000                | 10                      |
| Div  | 5e-3          | 1e5        | 1e-9                   | 1e-7                 | 10 000                | 10                      |
| Sqrt | 5e-3          | 1e5        | 1e-6                   | 1e-4                 | 10 000                | 10                      |
